# Supplementary material for: Nanostructured ionic hydrogel with integrated conductivity, stretchability and thermal responsiveness for a high-performance strain and temperature sensor
Source: Royal Society of Chemistry journal article supplement (doi:10.1039/d3bm00074e), 2023-01-01
Supplement: d3bm00074e1.pdf [file d3bm00074e1.pdf]

## Electronic Supplementary Material

### Nanostructured ionic hydrogel with integrated conductivity, stretchability and thermal responsiveness for high-performance strain and temperature sensor

Qian Pang,<sup>‡\*</sup> Kaihao Wu,<sup>‡</sup> Zilian Jiang, Fang Yang, Zewen Shi, Hanlin Gao, Cuicui Zhang, Ruixia Hou,<sup>\*</sup> and Yabin Zhu<sup>\*</sup>

Department of Cell Biology and Regenerative Medicine, Health Science Center, Ningbo University, Ningbo, Zhejiang, 315211, P. R. China

Email: [pangqian@nbu.edu.cn](mailto:pangqian@nbu.edu.cn) (Qian Pang); [houruixia@nbu.edu.cn](mailto:houruixia@nbu.edu.cn) (Ruixia Hou); [zhuyabin@nbu.edu.cn](mailto:zhuyabin@nbu.edu.cn) (Yabin Zhu)

<sup>‡</sup> These authors contributed equally to this work.

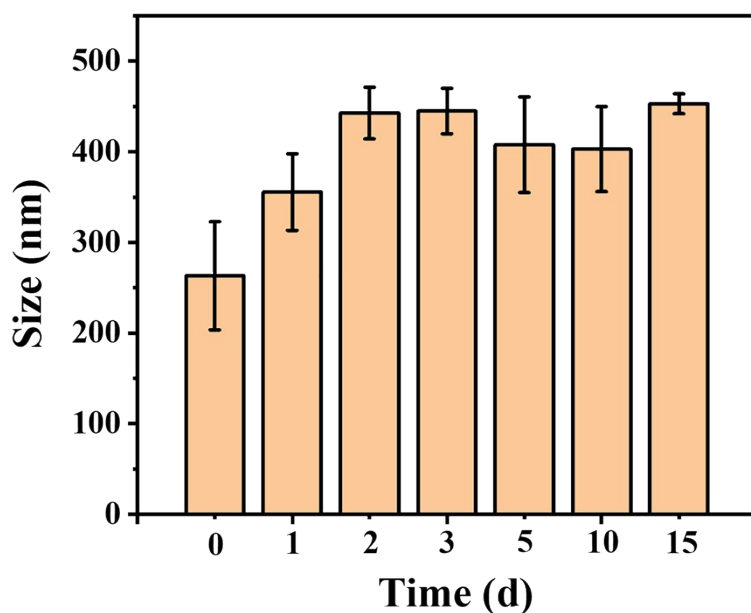

Fig.S1. The average change in the hydrated size of the PNI NG-5:1 sample within half a month.

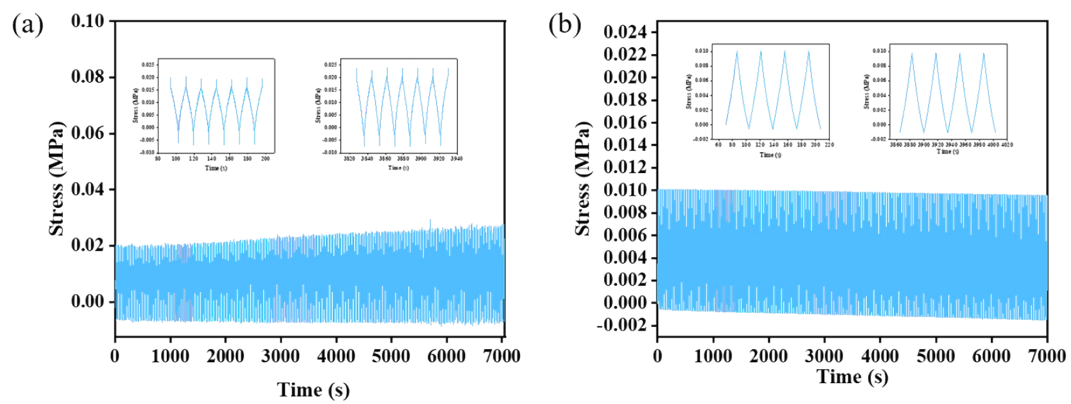

**Fig. S2.** (a) 500 consecutive tensile cycles of PNI NG@PSI-100 hydrogel under 100% strain and (b) 500 consecutive compressive loading-unloading cycles at a maximum strain of 50%.
